# Supplementary material
Source: PubMed Central journal article supplement (PMC3769933)
Supplement: mmc1.pdf [file mmc1.pdf]

## Supplemental Data

### Genetic Evidence for Recent

### Population Mixture in India

Priya Moorjani, Kumarasamy Thangaraj, Nick Patterson, Mark Lipson, Po-Ru Loh, Periyasamy Govindaraj, Bonnie Berger, David Reich, and Lalji Singh

#### Table of Contents

|                                                                                                                         |    |
|-------------------------------------------------------------------------------------------------------------------------|----|
| Figure S1: Historical relationships assumed for $F_4$ Ratio Estimation                                                  | 2  |
| Figure S2: <i>admixture graph</i> fitted models of Indian history                                                       | 3  |
| Figure S3: <i>rolloff</i> curves for each Indian group                                                                  | 4  |
| Figure S4: Distribution of nominal p-values in simulations of the likelihood ratio test                                 | 6  |
| Figure S5: Phylogenetic relationships of simulated populations Pop1-15                                                  | 7  |
| Figure S6: <i>admixture graph</i> fitted to simulated data used in <i>ALDER</i> analysis                                | 8  |
| Table S1: Data curation                                                                                                 | 9  |
| Table S2: Summary of <i>D</i> -statistics                                                                               | 11 |
| Table S3: <i>D</i> -statistic differences: (A) Madiga and (B) Kashmiri Pandit                                           | 12 |
| Table S4: Ancestry estimates from $F_4$ Ratio Estimation                                                                | 14 |
| Table S5: Comparison of expected and observed weighted LD amplitudes for simulated data.                                | 15 |
| Table S6: Dates of admixture using PCA loadings and one reference group                                                 | 16 |
| Table S7: Simulations to test bias in estimated dates of admixture for demographic parameters relevant to Indian groups | 17 |
| Table S8: Record of testing for consistency with simple ANI-ASI mixture                                                 | 18 |
| Table S9: Number of times each of 37 Indian groups is included in a rank 1 set                                          | 19 |
| References                                                                                                              | 20 |

Figure S1. Historical relationships assumed for  $F_4$  Ratio Estimation

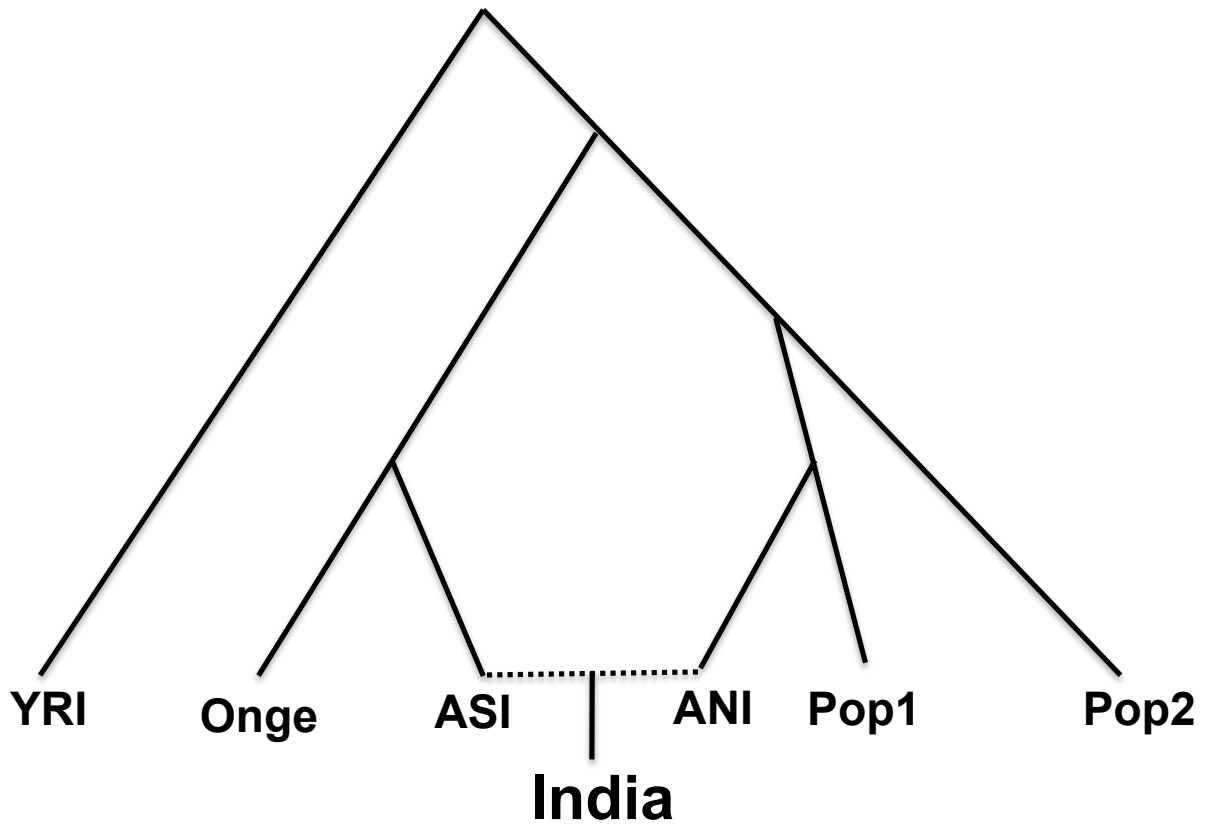

**Figure S2. admixture graph fitted models of Indian history.** We fit a model population relationships to the Indo-European and Dravidian rank 1 sets using *admixture graph*. We use the Affymetrix dataset ( $n = 210,482$  SNPs). The drift lengths shown below were estimated using  $X = \text{Basque}$ .

**(a) Indo-European rank 1 set**

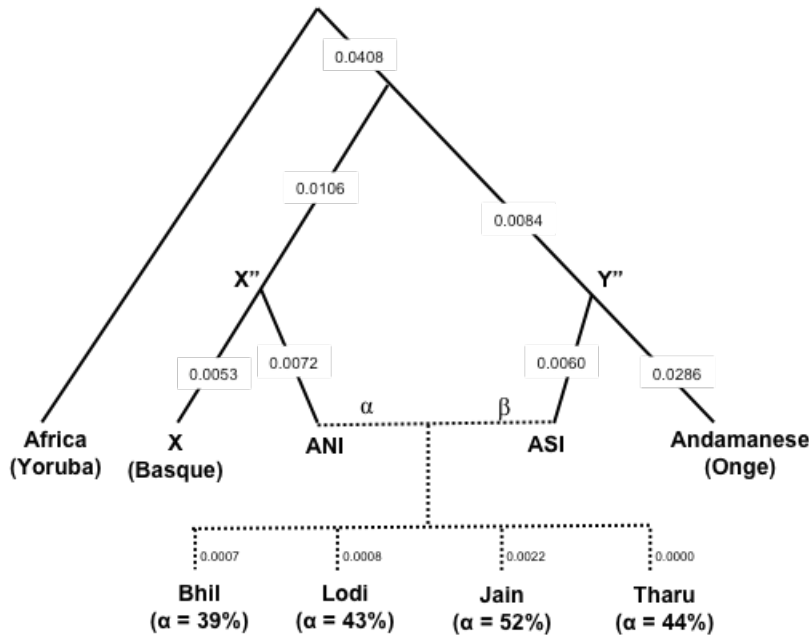

**(b) Dravidian rank 1 set**

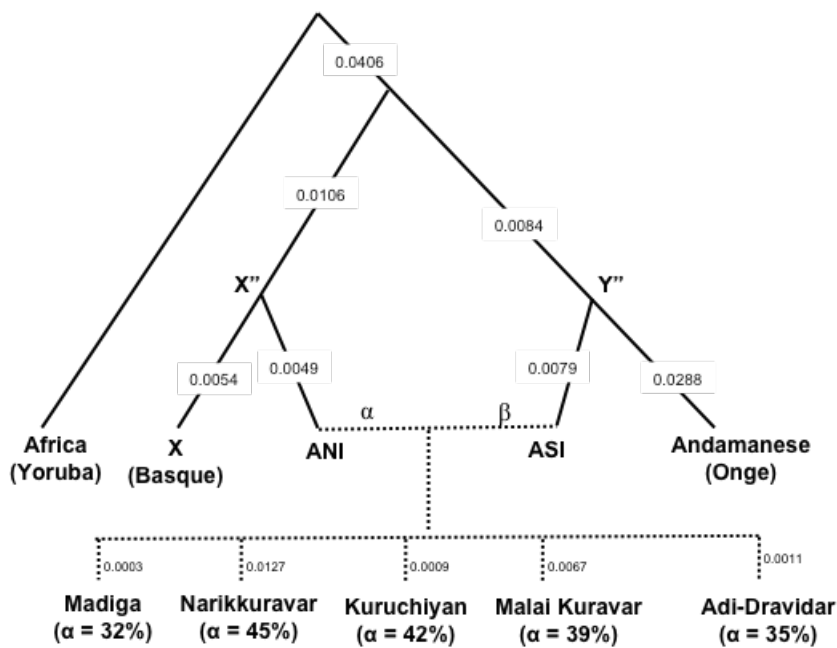

### Figure S3. rolloff curves for each Indian group.

**(a) Full dataset.** We use the full Affymetrix (494,863 SNPs) or Illumina (500,703 SNPs) dataset to increase precision. We run *rolloff* with weights computed by performing Principal Component Analysis (PCA) on data from all populations on the Indian-cline and CEU (excluding the test population). We ignore inter-SNP distances less than 0.5 cM to avoid confounding by background LD. The output is colored based on the linguistic affiliation of the group. Standard errors were computed by weighted block jackknife (see Material and Methods).

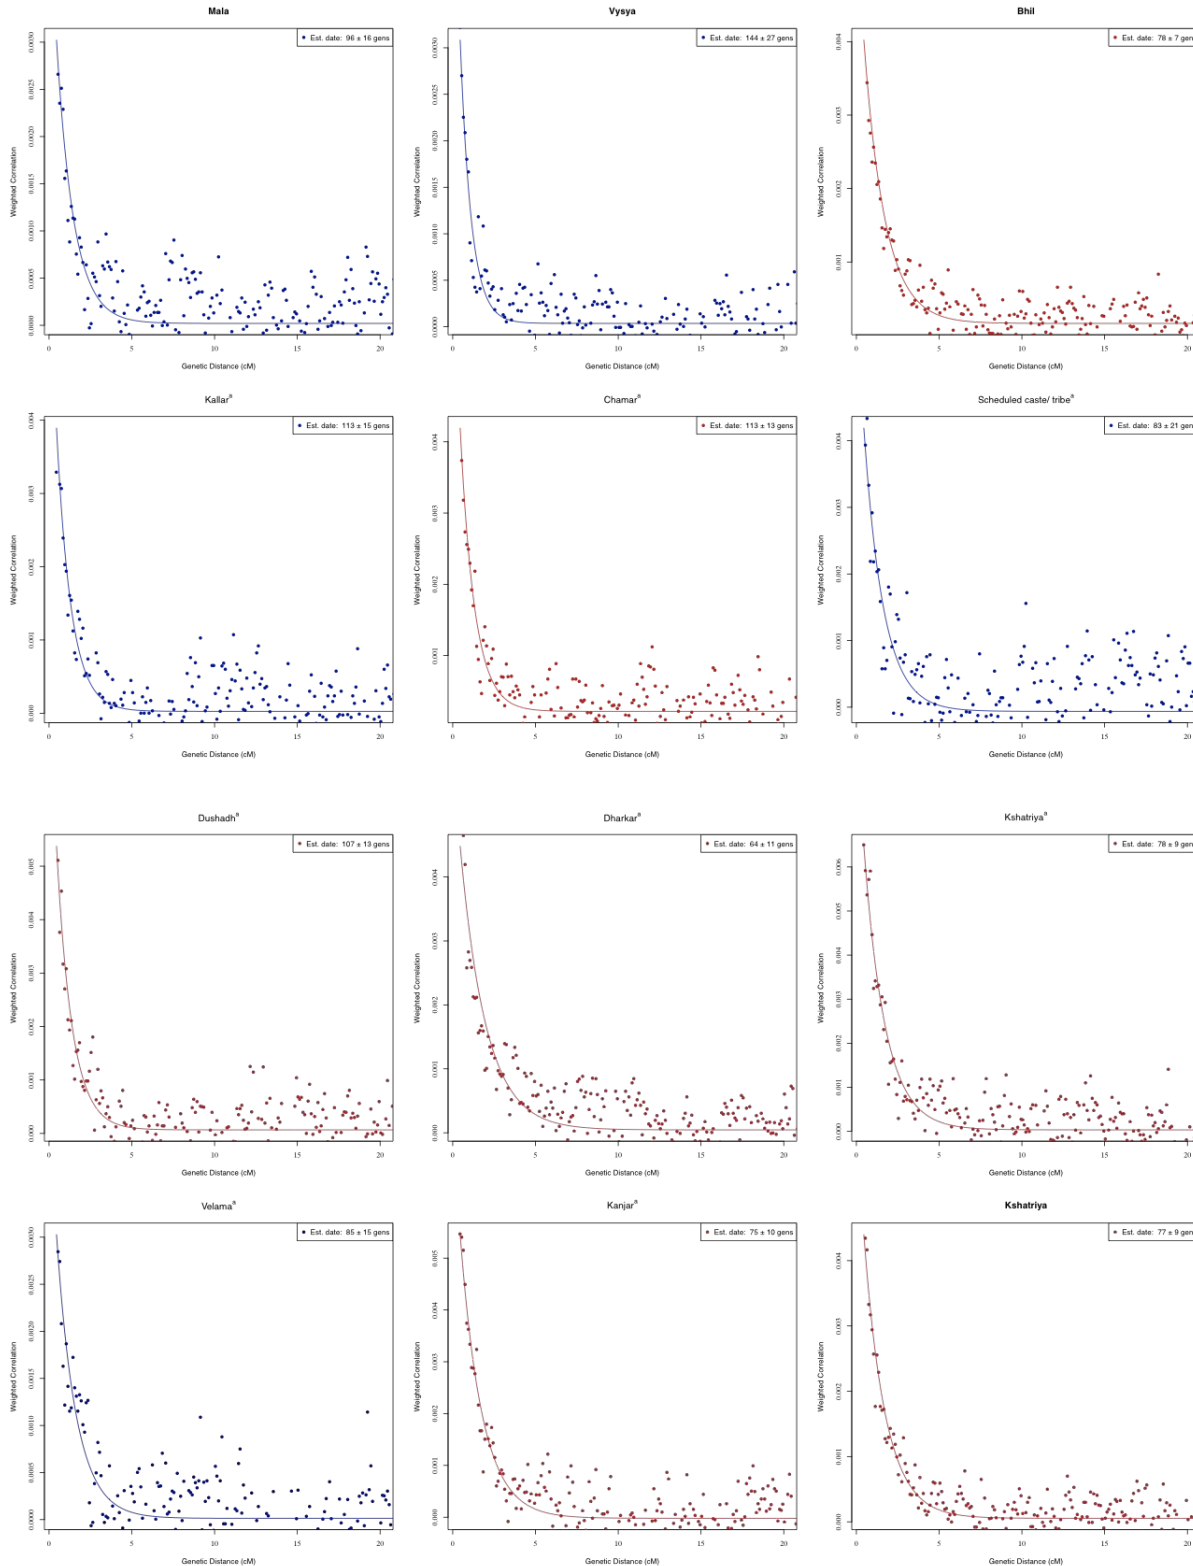

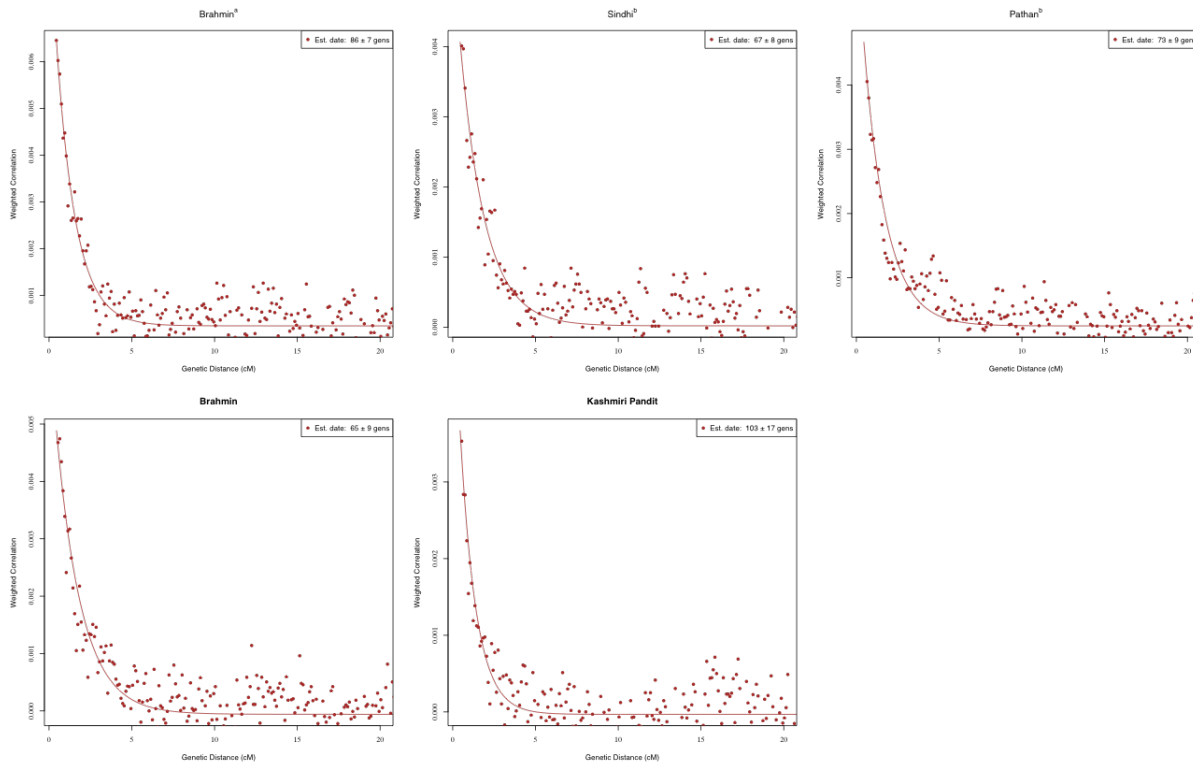

**(b) Rank 1 groups with a simple history of ANI-ASI admixture.** We performed *rolloff* analysis for *rank 1* groups, computing PCA based SNP loadings for Basque and Indian cline groups (not including the target admixed groups for computing the weights) with data for 210,482 SNPs. We ignore inter-SNP distances less than 0.5 cM to avoid confounding by background LD.

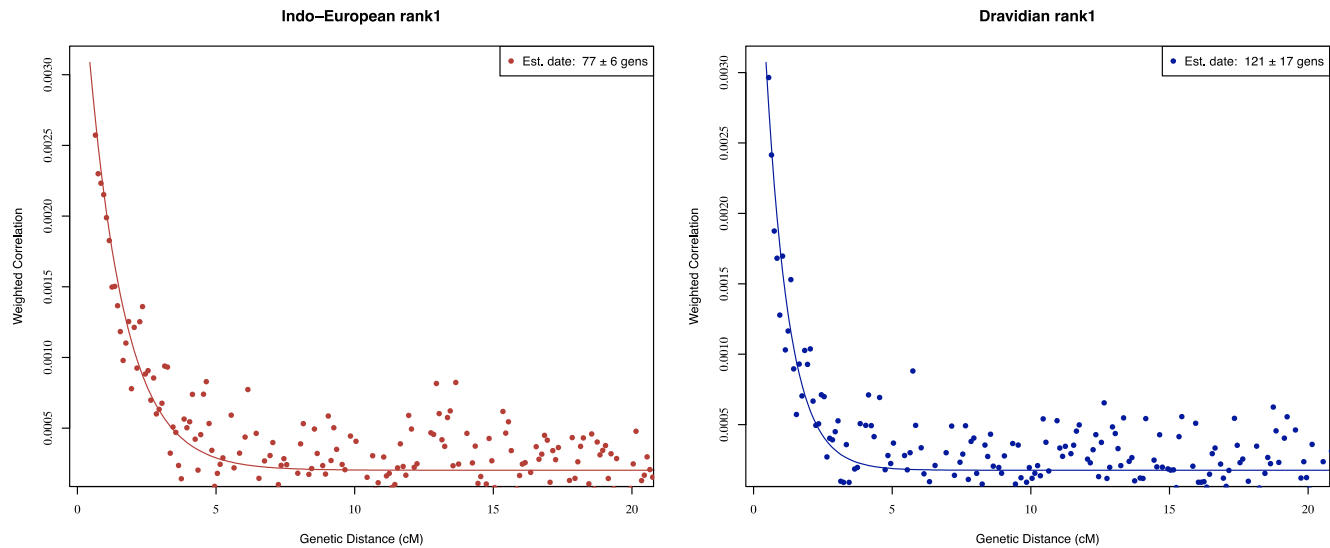

**Figure S4. Distribution of nominal p-values in simulations of the likelihood ratio test.** We performed 100,000 simulations based on the null model of a single pulse of mixture with noise. We use least squares to fit a null model of a single pulse of mixture ( $y = Ae^{-nd} + c$ ) and an alternative model of two pulses of mixture ( $y = Ae^{-n_1d} + Be^{-n_2d} + c$ ), where  $n, n_1, n_2$  are parameters capturing the times since mixture, and  $d$  is the genetic distance. We performed a likelihood ratio test that is  $\chi^2$  distributed with 2 degrees of freedom and plotted the distribution of the nominal p-values. We computed the observed tail ( $y$ ) as the proportion of observed p-values that are less than or equal to the theoretical p-values ( $x$ ), normalized by the total number of simulations. The values below  $-\log_{10}(0.05)$  are not shown. The dotted line indicates the regression line for the linear model between  $\log_{10}(y)$  and  $\log_{10}(x)$ .

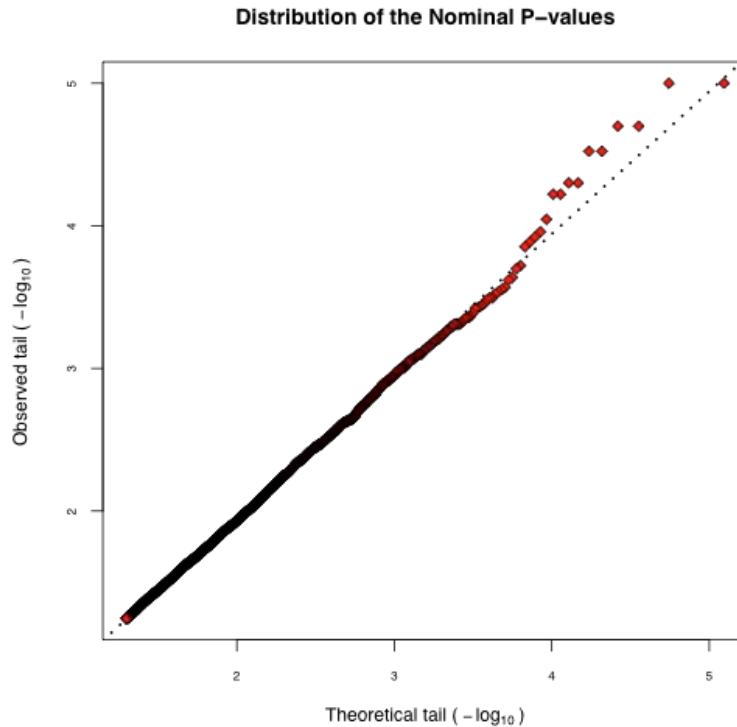

**Figure S5. Phylogenetic relationships of simulated populations Pop1-15.** Panel (a) shows the phylogenetic relationships of Pop1-15, and (b) shows PCA of Pop2-15. SNPs were ascertained in Pop1 and hence this population is not included in the PCA.

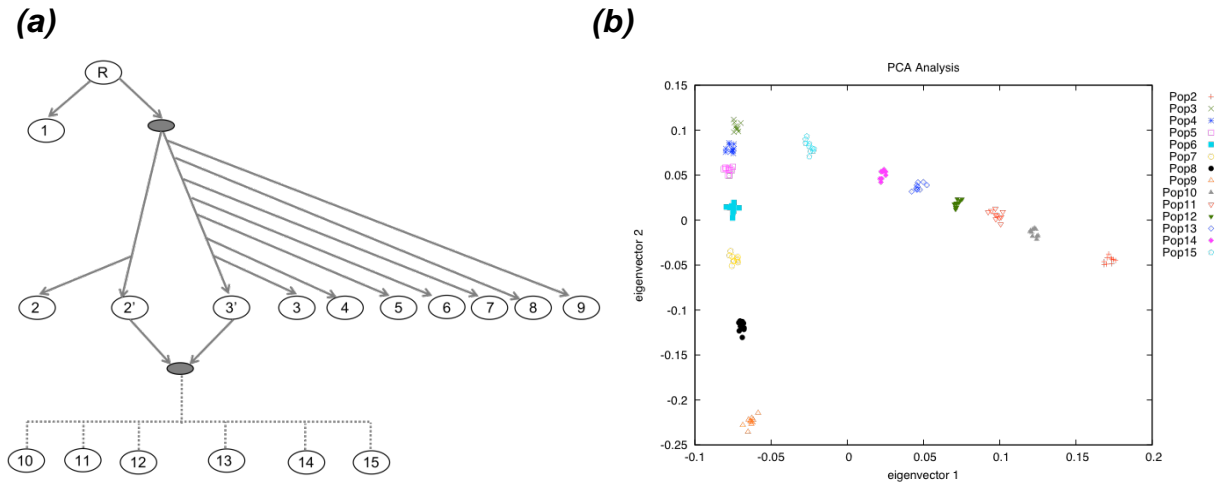

**Figure S6. Admixture graph fitted to simulated data used in ALDER analysis.** We simulated data for three groups (Sim-group1, Sim-group2, Sim-group3) using phased data from HGDP Han and HapMap CEU samples, where the admixed populations have a proportion  $\alpha$  of ancestry from CEU. We fit a model of population relationships using *admixture graph*. The drift lengths shown below are based on simulated data where Sim-group1 ( $\alpha = 30\%$ ), Sim-group2 ( $\alpha = 50\%$ ) and Sim-group3 ( $\alpha = 70\%$ ).

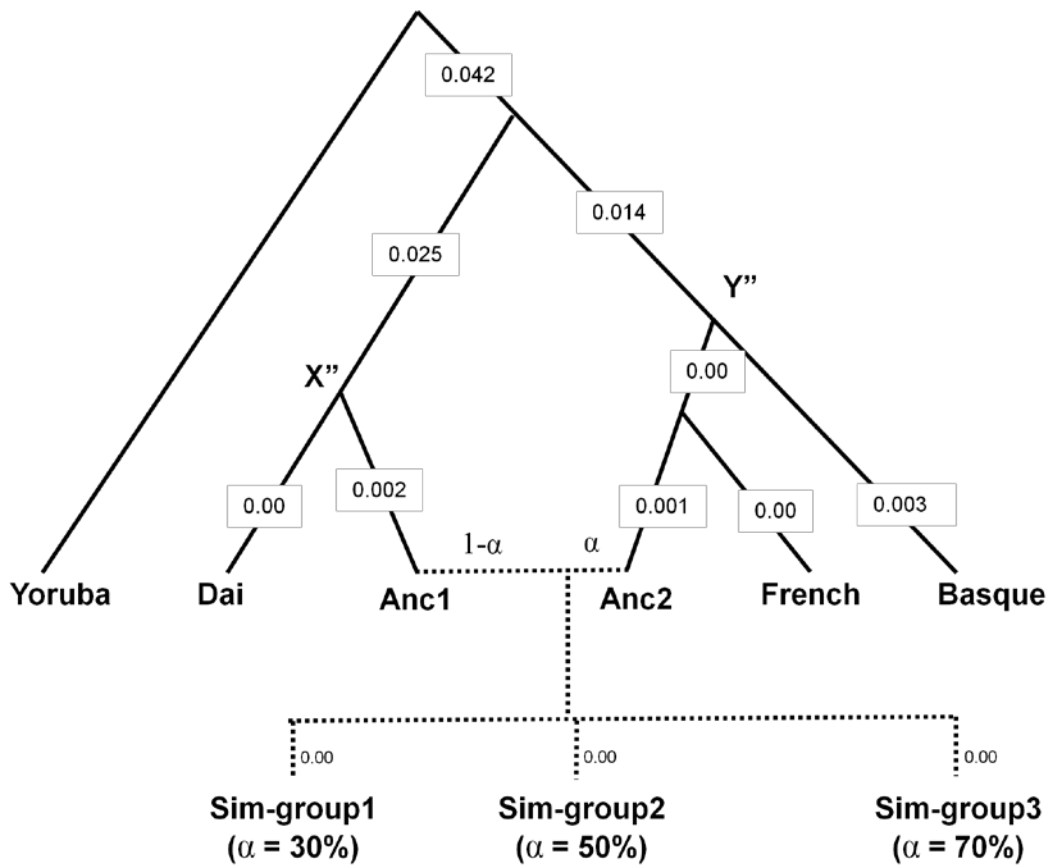



**Table S1: Data curation**

| Pop             | Dataset                 | Samples removed pre-PCA curation | Samples removed post-PCA curation | Total count (Post-curation) | Exclusion Criteria <sup>c</sup> |
|-----------------|-------------------------|----------------------------------|-----------------------------------|-----------------------------|---------------------------------|
| Adi-Dravidar    | This study              |                                  |                                   | 5                           |                                 |
| Bhil            | Reich 2009 & this study |                                  |                                   | 17                          |                                 |
| Bhumij          | This study              |                                  | 5                                 | 0                           | (1)                             |
| Birhor          | This study              | 1                                | 4                                 | 0                           | (a); (1)                        |
| Brahmin         | This study              | 5                                |                                   | 10                          | (b)                             |
| Changpa         | This study              |                                  | 5                                 | 0                           | (1)                             |
| Gond            | This study              | 1                                | 14                                | 0                           | (a); (1)                        |
| Ho              | This study              |                                  | 5                                 | 0                           | (1)                             |
| Irula           | This study              |                                  | 5                                 | 0                           | (2)                             |
| Jain            | This study              |                                  |                                   | 5                           |                                 |
| Jews            | This study              |                                  | 5                                 | 0                           | (2)                             |
| Kallar          | This study              |                                  |                                   | 5                           |                                 |
| Kattunayakan    | This study              |                                  |                                   | 5                           |                                 |
| Korku           | This study              | 1                                | 4                                 | 0                           | (a); (1)                        |
| Kshatriya       | This study              | 5                                |                                   | 15                          | (b)                             |
| Kuruchiyan      | This study              |                                  |                                   | 5                           |                                 |
| Gounder         | This study              |                                  |                                   | 5                           |                                 |
| Madiga          | Reich 2009 & this study | 5                                | 1                                 | 13                          | (b); (3)                        |
| Malai Kuravar   | This study              |                                  |                                   | 5                           |                                 |
| Mala            | Reich 2009 & this study | 5                                |                                   | 13                          | (b)                             |
| Mali            | This study              |                                  |                                   | 5                           |                                 |
| Minicoy         | This study              |                                  | 1                                 | 4                           | (3)                             |
| Munda           | This study              |                                  | 5                                 | 0                           | (1)                             |
| Narikkuravar    | This study              |                                  |                                   | 5                           |                                 |
| Palliyar        | This study              |                                  |                                   | 5                           |                                 |
| Kashmiri Pandit | Reich 2009 & this study | 5                                |                                   | 15                          | (b)                             |
| Paniya          | This study              |                                  |                                   | 5                           |                                 |
| Sherpa          | This study              |                                  | 5                                 | 0                           | (1)                             |
| Siddi           | Reich 2009 & this study | 2                                | 14                                | 0                           | (a); (1) <sup>1; 2</sup>        |
| Subba           | This study              |                                  | 5                                 | 0                           | (1)                             |
| Tibet-refugees  | This study              |                                  | 5                                 | 0                           | (1)                             |
| Vedda           | This study              |                                  |                                   | 4                           |                                 |
| Vysya           | Reich 2009 & this study | 5                                | 1                                 | 14                          | (b); (3)                        |
| Tharu           | Reich 2009              |                                  | 4                                 | 5                           | (3)                             |
| Meghawal        | Reich 2009              |                                  |                                   | 5                           |                                 |
| Chenchu         | Reich 2009              |                                  |                                   | 6                           |                                 |
| Kurumba         | Reich 2009              |                                  | 9                                 | 0                           | (2)                             |
| Hallaki         | Reich 2009              |                                  | 7                                 | 0                           | (2)                             |
| Santhal         | Reich 2009              |                                  | 7                                 | 0                           | (1)                             |
| Kharia          | Reich 2009              |                                  | 6                                 | 0                           | (1)                             |
| Vaish           | Reich 2009              |                                  |                                   | 4                           |                                 |
| Srivastava      | Reich 2009              |                                  |                                   | 2                           |                                 |
| Naidu           | Reich 2009              |                                  |                                   | 4                           |                                 |
| Velama          | Reich 2009              |                                  |                                   | 4                           |                                 |
| Sahariya        | Reich 2009              |                                  | 4                                 | 0                           | (1)                             |
| Lodi            | Reich 2009              |                                  |                                   | 5                           |                                 |

|                                     |               |   |    |    |                  |
|-------------------------------------|---------------|---|----|----|------------------|
| Satnami                             | Reich 2009    |   | 1  | 3  | (3)              |
| Kamsali                             | Reich 2009    |   |    | 4  |                  |
| Onge                                | Reich 2009    |   |    | 9  |                  |
| Great_Andamanese                    | Reich 2009    |   | 7  | 0  | (1) <sup>2</sup> |
| Nyshi                               | Reich 2009    |   | 4  | 0  | (1)              |
| Ao Naga                             | Reich 2009    |   | 4  | 0  | (1)              |
| Brahmin <sup>a</sup>                | Metspalu 2011 |   |    | 8  |                  |
| Kanjar <sup>a</sup>                 | Metspalu 2011 | 1 |    | 8  | (b)              |
| Chamar <sup>a</sup>                 | Metspalu 2011 |   |    | 10 |                  |
| Dushadh <sup>a</sup>                | Metspalu 2011 | 3 |    | 7  | (b)              |
| Kshatriya <sup>a</sup>              | Metspalu 2011 |   |    | 7  |                  |
| Kol <sup>a</sup>                    | Metspalu 2011 |   | 16 | 0  | (1)              |
| Dharkar <sup>a</sup>                | Metspalu 2011 | 1 |    | 11 | (b)              |
| Muslim <sup>a</sup>                 | Metspalu 2011 |   |    | 5  |                  |
| Scheduled caste <sup>a</sup>        | Metspalu 2011 |   | 6  | 0  | (2)              |
| central_mix1_nihali                 | Metspalu 2011 |   | 5  | 0  | (2)              |
| Gond <sup>a</sup>                   | Metspalu 2011 |   | 4  | 0  | (2)              |
| Munda <sup>a</sup>                  | Metspalu 2011 |   | 1  | 0  | (1)              |
| Scheduled caste/ tribe <sup>a</sup> | Metspalu 2011 |   |    | 6  |                  |
| Hakkipikki <sup>a</sup>             | Metspalu 2011 |   |    | 4  |                  |
| Ao Naga <sup>a</sup>                | Metspalu 2011 |   | 4  | 0  | (1)              |
| Chenchu <sup>a</sup>                | Metspalu 2011 |   |    | 4  |                  |
| Kallar <sup>a</sup>                 | Metspalu 2011 |   |    | 8  |                  |
| Velama <sup>a</sup>                 | Metspalu 2011 | 1 |    | 9  | (a)              |
| Palliyar <sup>a</sup>               | Metspalu 2011 |   |    | 5  |                  |
| Sindhi <sup>b</sup>                 | Li 2008       |   | 14 | 10 | (1) <sup>2</sup> |
| Pathan <sup>b</sup>                 | Li 2008       |   | 7  | 15 | (1) <sup>2</sup> |

<sup>c</sup>Samples were removed based on the following exclusion criteria:

Pre-PCA curation:

(a) Remove all duplicate samples: for each pair for samples that have >90% genotype matching, remove one sample.

(b) Remove all related samples: In the case of trios, the child was excluded and in case of first-degree relatives, one sample from the pair was excluded.

(c) Remove all samples previously excluded in Metspalu et al (2011): 8 samples were excluded (not shown in table above)<sup>3</sup>.

Post-PCA curation (Figure 1):

(1) Remove samples and groups that have evidence of recent ancestry from groups other than ANI and ASI based on PCA.

(2) Remove groups that are not homogenous in PCA.

(3) Remove samples that do not cluster with the majority of samples from their group.

**Table S2: Summary of *D*-statistics**

| Population (X)                      | <i>n</i> | Language Group | Social/ caste group | Pop with highest <i>D</i> -statistic mean | Pop with 2 <sup>nd</sup> highest <i>D</i> -statistic (Z-score) | Pop with 3 <sup>rd</sup> highest <i>D</i> -statistic (Z-score) |
|-------------------------------------|----------|----------------|---------------------|-------------------------------------------|----------------------------------------------------------------|----------------------------------------------------------------|
| Paniya                              | 5        | Dravidian      | Tribal              | Georgian                                  | Armenian (0.1)                                                 | Cypriot (0.3)                                                  |
| Palliyar                            | 5        | Dravidian      | Tribal              | Georgian                                  | Kurd (0.1)                                                     | Abhkasian (0.2)                                                |
| Kattunayakan                        | 5        | Dravidian      | Tribal              | Georgian                                  | Kurd (0.2)                                                     | Armenian (0.4)                                                 |
| Palliyar <sup>a</sup>               | 5        | Dravidian      | Lower caste         | Cypriot                                   | Abhkasian (0.4)                                                | Georgian (0.5)                                                 |
| Madiga                              | 13       | Dravidian      | Lower caste         | Georgian                                  | Lezgin (1.1)                                                   | Abhkasian (1.2)                                                |
| Mala                                | 13       | Dravidian      | Lower caste         | Georgian                                  | Abhkasian (0.5)                                                | Armenian (1.2)                                                 |
| Adi-Dravidar                        | 5        | Dravidian      | Lower caste         | Georgian                                  | Abhkasian (1.1)                                                | Armenian (1.5)                                                 |
| Hakkipikki <sup>a</sup>             | 4        | Dravidian      | Tribal              | Georgian                                  | Armenian (1.2)                                                 | Abhkasian (1.3)                                                |
| Vedda                               | 4        | Indo-European  | Tribal              | Georgian                                  | Abhkasian (0.1)                                                | Kurd (0.4)                                                     |
| Kamsali                             | 4        | Dravidian      | Lower caste         | Georgian                                  | Armenian (0.8)                                                 | Lezgin (0.6)                                                   |
| Chenchu <sup>a</sup>                | 4        | Dravidian      | Tribal              | Georgian                                  | Abhkasian (1.4)                                                | Armenian (2)                                                   |
| Chamar <sup>a</sup>                 | 10       | Indo-European  | Tribal              | Georgian                                  | Abhkasian (0.6)                                                | Lezgin (1.1)                                                   |
| Chenchu                             | 6        | Dravidian      | Tribal              | Georgian                                  | Abhkasian (0.7)                                                | Armenian (1.2)                                                 |
| Bhil                                | 17       | Indo-European  | Tribal              | Georgian                                  | Abhkasian (0.4)                                                | Armenian (1.0)                                                 |
| Kallar                              | 5        | Dravidian      | Lower caste         | Georgian                                  | Armenian (0.9)                                                 | Cypriot (1.0)                                                  |
| Kallar <sup>a</sup>                 | 8        | Dravidian      | Tribal              | Georgian                                  | Abhkasian (1.2)                                                | Lezgin (2.0)                                                   |
| Vysya                               | 14       | Dravidian      | Middle caste        | Georgian                                  | Abhkasian (1.1)                                                | Armenian (1.7)                                                 |
| Malai Kuravar                       | 5        | Dravidian      | Tribal              | Georgian                                  | Abhkasian (0.4)                                                | Armenian (1.5)                                                 |
| Satnami                             | 3        | Indo-European  | Lower caste         | Georgian                                  | Abhkasian (0.2)                                                | Tuscan (0.8)                                                   |
| Kuruchiyar                          | 5        | Dravidian      | Tribal              | Georgian                                  | Abhkasian (1.1)                                                | Armenian (1.7)                                                 |
| Dushadh <sup>a</sup>                | 7        | Indo-European  | Lower caste         | Georgian                                  | Abhkasian (0.2)                                                | Lezgin (1.1)                                                   |
| Scheduled caste/ tribe <sup>a</sup> | 6        | Dravidian      | Lower caste         | Georgian                                  | Kurd (0.6)                                                     | Abhkasian (0.8)                                                |
| Mali                                | 5        | Dravidian      | Lower caste         | Georgian                                  | Armenian (1.3)                                                 | Abhkasian (1.4)                                                |
| Minicoy                             | 4        | Indo-European  | Lower caste         | Georgian                                  | Abhkasian (2.3)                                                | Cypriot (2.3)                                                  |
| Gounder                             | 5        | Dravidian      | Middle caste        | Georgian                                  | Kurd (0.6)                                                     | Abhkasian (0.9)                                                |
| Lodi                                | 5        | Indo-European  | Lower caste         | Georgian                                  | Armenian (2)                                                   | Abhkasian (2.0)                                                |
| Naidu                               | 4        | Dravidian      | Upper caste         | Georgian                                  | Armenian (1.3)                                                 | Abhkasian (1.1)                                                |
| Velama                              | 4        | Dravidian      | Upper caste         | Georgian                                  | Abhkasian (1.3)                                                | Armenian (2.8)                                                 |
| Velama <sup>a</sup>                 | 9        | Dravidian      | Upper caste         | Georgian                                  | Armenian (1)                                                   | Abhkasian (0.9)                                                |
| Narikkuravar                        | 5        | Dravidian      | Tribal              | Georgian                                  | Abhkasian (0.5)                                                | Cypriot (1.3)                                                  |
| Tharu                               | 5        | Indo-European  | Tribal              | Georgian                                  | Lezgin (0.8)                                                   | Abhkasian (1.1)                                                |
| Dharkar <sup>a</sup>                | 11       | Indo-European  | Nomadic group       | Georgian                                  | Tuscan (1.0)                                                   | Armenian (2.0)                                                 |
| Kanjar <sup>a</sup>                 | 8        | Indo-European  | Nomadic group       | Georgian                                  | Abhkasian (1.2)                                                | Tuscan (0.8)                                                   |
| Muslim <sup>a</sup>                 | 5        | Indo-European  | Religious group     | Georgian                                  | Abhkasian (1.2)                                                | Armenian (1.9)                                                 |
| Srivastava                          | 2        | Indo-European  | Upper caste         | Georgian                                  | Abhkasian (-0.3)                                               | Cypriot (0.1)                                                  |
| Jain                                | 5        | Indo-European  | Religious group     | Georgian                                  | Abhkasian (0.8)                                                | Lezgin (1.2)                                                   |
| Meghawal                            | 5        | Indo-European  | Lower caste         | Georgian                                  | Abhkasian (0.8)                                                | Cypriot (1.3)                                                  |
| Kshatriya <sup>a</sup>              | 7        | Indo-European  | Upper caste         | Georgian                                  | Abhkasian (1.4)                                                | Lezgin (1.9)                                                   |
| Vaish                               | 4        | Indo-European  | Upper caste         | Georgian                                  | Lezgin (1.0)                                                   | Armenian (2.2)                                                 |
| Brahmin <sup>a</sup>                | 8        | Indo-European  | Upper caste         | Tuscan                                    | Lezgin (0.0)                                                   | Georgian (0.1)                                                 |
| Kshatriya                           | 15       | Indo-European  | Upper caste         | Georgian                                  | Abhkasian (0.9)                                                | Tuscan (0.8)                                                   |
| Brahmin                             | 10       | Indo-European  | Upper caste         | Georgian                                  | Tuscan (1.1)                                                   | Lezgin (1.6)                                                   |
| Sindhi <sup>b</sup>                 | 10       | Indo-European  | Urban group         | Georgian                                  | Armenian (2.6)                                                 | Abhkasian (2.4)                                                |
| Kashmiri Pandit                     | 15       | Indo-European  | Upper caste         | Georgian                                  | Abhkasian (2.0)                                                | Armenian (2.6)                                                 |
| Pathan <sup>b</sup>                 | 15       | Indo-European  | Urban group         | Georgian                                  | Armenian (2.1)                                                 | Abhkasian (1.6)                                                |

We compute  $D(\text{Onge}, X; \text{YRI}, Y)$  where  $X$  is an Indian group shown above and  $Y$  is a West Eurasian group chosen from a panel of 43 groups including Europeans, Central Asians, Middle Easterners and Caucasian populations. We display the results for the population  $Y$  with the highest  $D$ -statistic mean, the 2<sup>nd</sup> highest  $D$ -statistic mean (Z-score for the difference between highest and 2<sup>nd</sup> highest group), and the 3<sup>rd</sup> highest  $D$ -statistic mean (Z-score for the difference between the highest and 3<sup>rd</sup> highest). We consider  $|Z| > 3$  to be statistically significant. <sup>a</sup> indicates samples from Metspalu et al (2011) and <sup>b</sup> indicates samples from HGDP.

**Table S3 (A): *D*-statistic differences: Madiga**

| Population (Y) | <i>n</i> | Sampling Location | Geographic Group | Mean difference in <i>D</i> -statistics | Z-score of difference in <i>D</i> -statistics |
|----------------|----------|-------------------|------------------|-----------------------------------------|-----------------------------------------------|
| Lezgin         | 18       | Caucasus          | Caucasus         | 0.0001                                  | 1.1                                           |
| Abkhasian      | 20       | Caucasus          | Caucasus         | 0.0001                                  | 1.2                                           |
| Armenian       | 35       | Armenia           | Caucasus         | 0.0002                                  | 2.0                                           |
| Kurd           | 6        | Kazakhstan        | Central Asia     | 0.0002                                  | 1.3                                           |
| Chechen        | 20       | Caucasus          | Caucasus         | 0.0002                                  | 2.1                                           |
| Cypriot        | 12       | Cyprus            | Europe           | 0.0003                                  | 2.2                                           |
| Iranian        | 20       | Iran              | Central Asia     | 0.0003                                  | 2.8                                           |
| Druze          | 42       | Israel            | Near East        | 0.0004                                  | 3.4                                           |
| Syrian         | 16       | Syria             | Near East        | 0.0004                                  | 3.3                                           |
| Adygei         | 17       | Caucasus          | Caucasus         | 0.0004                                  | 3.4                                           |
| Tuscan         | 7        | Italy             | Europe           | 0.0004                                  | 3.0                                           |
| North Ossetian | 15       | Russia            | Caucasus         | 0.0004                                  | 3.5                                           |
| TSI            | 87       | Italy             | Europe           | 0.0005                                  | 4.6                                           |
| Lebanese       | 7        | Lebanon           | Near East        | 0.0005                                  | 3.1                                           |
| Turk           | 19       | Turkey            | Near East        | 0.0005                                  | 4.7                                           |
| Basque         | 24       | France            | Europe           | 0.0005                                  | 3.9                                           |
| Kumyk          | 14       | Russia            | Caucasus         | 0.0005                                  | 4.5                                           |
| CEU            | 110      | United States     | Europe           | 0.0005                                  | 5.0                                           |
| Orcadian       | 15       | United Kingdom    | Europe           | 0.0005                                  | 3.9                                           |
| Italian        | 12       | Italy             | Europe           | 0.0006                                  | 4.1                                           |
| Jordanian      | 19       | Jordania          | Near East        | 0.0006                                  | 4.9                                           |
| Hungarian      | 20       | Hungary           | Europe           | 0.0006                                  | 4.5                                           |
| French         | 28       | France            | Europe           | 0.0006                                  | 5.0                                           |
| Lithuanian     | 10       | Lithuania         | Europe           | 0.0006                                  | 3.9                                           |
| Spaniard       | 12       | Spain             | Europe           | 0.0006                                  | 4.6                                           |
| Bulgarian      | 13       | Bulgaria          | Europe           | 0.0006                                  | 5.0                                           |
| Balkar         | 19       | Caucasus          | Caucasus         | 0.0006                                  | 5.8                                           |
| Ukranian       | 20       | Ukraine           | Europe           | 0.0006                                  | 5.3                                           |
| Palestinian    | 46       | Israel            | Near East        | 0.0007                                  | 6.1                                           |
| Romanian       | 16       | Romania           | Europe           | 0.0007                                  | 5.6                                           |
| Sardinian      | 28       | Italy             | Europe           | 0.0007                                  | 5.4                                           |
| Saudi          | 19       | Saudi Arabia      | Near East        | 0.0007                                  | 5.2                                           |
| Bedouin        | 45       | Israel            | Near East        | 0.0008                                  | 6.2                                           |
| Belorussian    | 9        | Belorussia        | Europe           | 0.0008                                  | 5.5                                           |
| Mordovian      | 15       | Russia            | Europe           | 0.0010                                  | 7.7                                           |
| Russian        | 27       | Russia            | Europe           | 0.0011                                  | 9.0                                           |
| Tajik          | 15       | Tajikstan         | Central Asia     | 0.0011                                  | 8.5                                           |
| Yemenese       | 10       | Yemen             | Near East        | 0.0013                                  | 8.3                                           |
| Turkmen        | 15       | Turkmenistan      | Central Asia     | 0.0016                                  | 11.3                                          |
| Nogai          | 16       | Russia            | Caucasus         | 0.0017                                  | 13.3                                          |
| Chuvash        | 17       | Russia            | Europe           | 0.0020                                  | 13.1                                          |
| Uzbek          | 15       | Uzbekstan         | Central Asia     | 0.0032                                  | 19.7                                          |

We compare  $D(\text{Onge, Madiga; YRI, Georgian}) = 0.0335$  ( $Z = 16.7$ ) with  $D(\text{Onge, Madiga; YRI, } Y)$  where  $Y$  is any West Eurasian group chosen from a panel of 42 groups including Europeans, Central Asians, Middle Easterners and Caucasian populations. For each  $Y$ , we display the difference in mean and Z-score of  $D$ -statistics (i.e.  $D(\text{Onge, Madiga; YRI, Georgian}) - D(\text{Onge, Madiga; YRI, } Y)$ ) and the corresponding Z-score for the difference).

**Table S3 (B): *D*-statistic differences: Kashmiri Pandit**

| Population (X) | <i>n</i> | Sampling Location | Geographic Group | Mean difference in <i>D</i> -statistics | Z-score of difference in <i>D</i> -statistics |
|----------------|----------|-------------------|------------------|-----------------------------------------|-----------------------------------------------|
| Abkhasian      | 20       | Caucasus          | Caucasus         | 0.0002                                  | 2.0                                           |
| Lezgin         | 18       | Caucasus          | Caucasus         | 0.0003                                  | 2.2                                           |
| Armenian       | 35       | Armenia           | Caucasus         | 0.0003                                  | 2.6                                           |
| Cypriot        | 12       | Cyprus            | Europe           | 0.0004                                  | 2.8                                           |
| Tuscan         | 7        | Italy             | Europe           | 0.0004                                  | 2.4                                           |
| Chechen        | 20       | Caucasus          | Caucasus         | 0.0004                                  | 3.6                                           |
| TSI            | 87       | Italy             | Europe           | 0.0005                                  | 4.9                                           |
| Kurd           | 6        | Kazakhstan        | Central Asia     | 0.0005                                  | 3.0                                           |
| Orcadian       | 15       | United Kingdom    | Europe           | 0.0005                                  | 3.6                                           |
| CEU            | 110      | United States     | Europe           | 0.0005                                  | 4.8                                           |
| Basque         | 24       | France            | Europe           | 0.0005                                  | 4.0                                           |
| Italian        | 12       | Italy             | Europe           | 0.0005                                  | 3.8                                           |
| Lithuanian     | 10       | Lithuania         | Europe           | 0.0005                                  | 3.5                                           |
| French         | 28       | France            | Europe           | 0.0006                                  | 4.8                                           |
| Druze          | 42       | Israel            | Near East        | 0.0006                                  | 5.4                                           |
| Hungarian      | 20       | Hungary           | Europe           | 0.0006                                  | 5.0                                           |
| Spaniard       | 12       | Spain             | Europe           | 0.0007                                  | 5.2                                           |
| Bulgarian      | 13       | Bulgaria          | Europe           | 0.0008                                  | 5.8                                           |
| Sardinian      | 28       | Italy             | Europe           | 0.0008                                  | 5.8                                           |
| Adygei         | 17       | Caucasus          | Caucasus         | 0.0008                                  | 6.4                                           |
| Ukrainian      | 20       | Ukraine           | Europe           | 0.0008                                  | 6.3                                           |
| Belorussian    | 9        | Belorussia        | Europe           | 0.0009                                  | 5.4                                           |
| North Ossetian | 15       | Russia            | Caucasus         | 0.0009                                  | 7.0                                           |
| Syrian         | 16       | Syria             | Near East        | 0.0009                                  | 7.5                                           |
| Romanian       | 16       | Romania           | Europe           | 0.0010                                  | 7.4                                           |
| Turk           | 19       | Turkey            | Near East        | 0.0010                                  | 8.6                                           |
| Iranian        | 20       | Iran              | Central Asia     | 0.0010                                  | 8.4                                           |
| Balkar         | 19       | Caucasus          | Caucasus         | 0.0010                                  | 9.2                                           |
| Lebanese       | 7        | Lebanon           | Near East        | 0.0010                                  | 6.4                                           |
| Kumyk          | 14       | Russia            | Caucasus         | 0.0011                                  | 8.8                                           |
| Jordanian      | 19       | Jordania          | Near East        | 0.0012                                  | 10.1                                          |
| Palestinian    | 46       | Israel            | Near East        | 0.0013                                  | 11.1                                          |
| Bedouin        | 45       | Israel            | Near East        | 0.0014                                  | 11.2                                          |
| Mordovian      | 15       | Russia            | Europe           | 0.0014                                  | 10.6                                          |
| Saudi          | 19       | Saudi Arabia      | Near East        | 0.0014                                  | 10.6                                          |
| Russian        | 27       | Russia            | Europe           | 0.0015                                  | 12.2                                          |
| Tajik          | 15       | Tajikstan         | Central Asia     | 0.0026                                  | 18.5                                          |
| Yemenese       | 10       | Yemen             | Near East        | 0.0030                                  | 17.3                                          |
| Nogai          | 16       | Russia            | Caucasus         | 0.0031                                  | 22.1                                          |
| Turkmen        | 15       | Turkmenistan      | Central Asia     | 0.0031                                  | 20.2                                          |
| Chuvash        | 17       | Russia            | Europe           | 0.0032                                  | 20.7                                          |
| Uzbek          | 15       | Uzbekstan         | Central Asia     | 0.0057                                  | 31.6                                          |

We compare  $D(\text{Onge, Kashmiri Pandit; YRI, Georgian}) = 0.0627$  ( $Z = 29.7$ ) with  $D(\text{Onge, Kashmiri Pandit; YRI, } Y)$  where  $Y$  is any West Eurasian group chosen from a panel of 42 groups including Europeans, Central Asians, Middle Easterners and Caucasian groups. For each  $Y$ , we display the difference in mean and Z-score of *D*-statistics ( $D(\text{Onge, Kashmiri Pandit; YRI, Georgian}) - D(\text{Onge, Kashmiri Pandit; YRI, } Y)$ ) and the corresponding Z-score for the difference).

**Table S4: Ancestry estimates from  $F_4$  Ratio Estimation**

| Population (X)                      | <i>n</i> | Language Group | Social/ caste group | $^{\S}$ ANI Ancestry (Pop2 = Basque) | $^{\S}$ ANI Ancestry (Pop2=Abhkasian) | $^{\S}$ ANI ancestry (Reich 09) |
|-------------------------------------|----------|----------------|---------------------|--------------------------------------|---------------------------------------|---------------------------------|
| Paniya                              | 5        | Dravidian      | Tribal              | 16.7 ± 2.4                           | 16.8 ± 2.1                            | 22.5 ± 1.6                      |
| Palliyar                            | 5        | Dravidian      | Tribal              | 21.2 ± 2.3                           | 22.8 ± 2                              | 29.1 ± 1.4                      |
| Kattunayakan                        | 5        | Dravidian      | Tribal              | 24.6 ± 2.1                           | 25.1 ± 1.9                            | 30.8 ± 1.5                      |
| Palliyar <sup>a</sup>               | 5        | Dravidian      | Lower caste         | 24.2 ± 2.4                           | 25.6 ± 2.1                            | 31.4 ± 1.5                      |
| Madiga                              | 13       | Dravidian      | Lower caste         | 32 ± 1.7                             | 33.1 ± 1.5                            | 40.6 ± 1.1                      |
| Mala                                | 13       | Dravidian      | Lower caste         | 34.3 ± 1.7                           | 35.8 ± 1.5                            | 39.9 ± 1.1                      |
| Adi-Dravidar                        | 5        | Dravidian      | Lower caste         | 34.7 ± 2                             | 35.7 ± 1.7                            | 40.9 ± 1.3                      |
| Hakkipikki <sup>a</sup>             | 4        | Dravidian      | Tribal              | 36.2 ± 2                             | 35.4 ± 1.8                            | 40.8 ± 1.4                      |
| Vedda                               | 4        | Indo-European  | Tribal              | 36 ± 2.5                             | 38 ± 2.2                              | 41.3 ± 1.6                      |
| Kamsali                             | 4        | Dravidian      | Lower caste         | 36.5 ± 2.1                           | 38 ± 1.8                              | 43.1 ± 1.4                      |
| Chenchu <sup>a</sup>                | 4        | Dravidian      | Tribal              | 37.2 ± 2.1                           | 38.1 ± 1.9                            | 43.4 ± 1.4                      |
| Chamar <sup>a</sup>                 | 10       | Indo-European  | Tribal              | 38.7 ± 1.7                           | 38.5 ± 1.5                            | 43.1 ± 1.1                      |
| Chenchu                             | 6        | Dravidian      | Tribal              | 39 ± 2.2                             | 38.4 ± 2                              | 41.7 ± 1.4                      |
| Bhil                                | 17       | Indo-European  | Tribal              | 38.9 ± 1.6                           | 39.3 ± 1.4                            | 45.8 ± 1                        |
| Kallar                              | 5        | Dravidian      | Lower caste         | 37.3 ± 2.1                           | 39.4 ± 1.8                            | 44.5 ± 1.3                      |
| Kallar <sup>a</sup>                 | 8        | Dravidian      | Tribal              | 37.7 ± 1.8                           | 40.4 ± 1.5                            | 47.1 ± 1.1                      |
| Vysya                               | 14       | Dravidian      | Middle caste        | 37.9 ± 1.8                           | 41.2 ± 1.5                            | 47.2 ± 1.1                      |
| Malai Kuravar                       | 5        | Dravidian      | Tribal              | 38.8 ± 2.1                           | 41.2 ± 1.9                            | 46.8 ± 1.3                      |
| Satnami                             | 3        | Indo-European  | Lower caste         | 40.7 ± 2.1                           | 40.8 ± 1.9                            | 43.4 ± 1.4                      |
| Kuruchiyar                          | 5        | Dravidian      | Tribal              | 41.9 ± 1.9                           | 43.2 ± 1.7                            | 48.6 ± 1.2                      |
| Dushadh <sup>a</sup>                | 7        | Indo-European  | Lower caste         | 41 ± 1.8                             | 42.8 ± 1.6                            | 48.2 ± 1.2                      |
| Scheduled caste/ tribe <sup>a</sup> | 6        | Dravidian      | Lower caste         | 40.5 ± 1.9                           | 43.5 ± 1.6                            | 48.8 ± 1.2                      |
| Mali                                | 5        | Dravidian      | Lower caste         | 44 ± 2                               | 43.3 ± 1.8                            | 53.1 ± 1.2                      |
| Minicoy                             | 4        | Indo-European  | Lower caste         | 42.9 ± 2                             | 43.1 ± 1.7                            | 48.9 ± 1.3                      |
| Gounder                             | 5        | Dravidian      | Middle caste        | 42.9 ± 1.9                           | 45.8 ± 1.7                            | 51.8 ± 1.2                      |
| Lodi                                | 5        | Indo-European  | Lower caste         | 43.1 ± 1.9                           | 43.4 ± 1.7                            | 49.4 ± 1.2                      |
| Naidu                               | 4        | Dravidian      | Upper caste         | 43.2 ± 2                             | 44.3 ± 1.8                            | 48.5 ± 1.3                      |
| Velama                              | 4        | Dravidian      | Upper caste         | 42.7 ± 2                             | 46.3 ± 1.7                            | 53.9 ± 1.3                      |
| Velama <sup>a</sup>                 | 9        | Dravidian      | Upper caste         | 43.4 ± 1.7                           | 45.3 ± 1.5                            | 51.1 ± 1.1                      |
| Narikkuravar                        | 5        | Dravidian      | Tribal              | 45 ± 2.2                             | 46.1 ± 1.9                            | 50.5 ± 1.5                      |
| Tharu                               | 5        | Indo-European  | Tribal              | 43.6 ± 1.9                           | 43.3 ± 1.7                            | 50.5 ± 1.2                      |
| Dharkar <sup>a</sup>                | 11       | Indo-European  | Nomadic group       | 47.8 ± 1.5                           | 47.3 ± 1.3                            | 54.6 ± 1                        |
| Kanjar <sup>a</sup>                 | 8        | Indo-European  | Nomadic group       | 48.2 ± 1.7                           | 47.1 ± 1.5                            | 53.5 ± 1.1                      |
| Muslim <sup>a</sup>                 | 5        | Indo-European  | Religious group     | 49.4 ± 1.8                           | 49.4 ± 1.5                            | 55.1 ± 1.2                      |
| Srivastava                          | 2        | Indo-European  | Upper caste         | 52.3 ± 2.5                           | 51.6 ± 2.2                            | 56.4 ± 1.5                      |
| Jain                                | 5        | Indo-European  | Religious group     | 51.6 ± 1.9                           | 52.1 ± 1.7                            | 58 ± 1.2                        |
| Meghawal                            | 5        | Indo-European  | Lower caste         | 53.6 ± 1.8                           | 53.2 ± 1.6                            | 58.2 ± 1.1                      |
| Kshatriya <sup>a</sup>              | 7        | Indo-European  | Upper caste         | 54.6 ± 1.6                           | 53 ± 1.4                              | 60.7 ± 0.9                      |
| Vaish                               | 4        | Indo-European  | Upper caste         | 56.5 ± 1.7                           | 54.5 ± 1.5                            | 60.1 ± 1.2                      |
| Brahmin <sup>a</sup>                | 8        | Indo-European  | Upper caste         | 61.2 ± 1.4                           | 57.8 ± 1.3                            | 63.9 ± 0.9                      |
| Kshatriya                           | 15       | Indo-European  | Upper caste         | 60.9 ± 1.3                           | 58.4 ± 1.2                            | 63.6 ± 0.8                      |
| Brahmin                             | 10       | Indo-European  | Upper caste         | 62.8 ± 1.4                           | 59.2 ± 1.3                            | 64.5 ± 0.9                      |
| Sindhi <sup>b</sup>                 | 10       | Indo-European  | Urban group         | 64.3 ± 1.3                           | 62.7 ± 1.2                            | 71.8 ± 0.8                      |
| Kashmiri Pandit                     | 15       | Indo-European  | Upper caste         | 65.2 ± 1.3                           | 63.8 ± 1.1                            | 68.6 ± 0.8                      |
| Pathan <sup>b</sup>                 | 15       | Indo-European  | Urban group         | 70.4 ± 1.2                           | 67.9 ± 1                              | 74.8 ± 0.7                      |

We performed  $F_4$  Ratio Estimation to estimate the proportion of ANI ancestry in Indians. Specifically, we use the following statistics:  $^{\S}$ ANI ancestry (Pop2 = Basque) =  $f_4(\text{YRI, Basque; X, Onge}) / f_4(\text{YRI, Basque; Georgian, Onge})$ ;  $^{\S}$ ANI ancestry (Pop2 = Abhkasian) =  $f_4(\text{YRI, Abhkasian; X, Onge}) / f_4(\text{YRI, Abhkasian; Georgian, Onge})$ ;  $^{\S}$ ANI ancestry (Reich et al., 09) =  $f_4(\text{Adygei, Papuan; X, Onge}) / f_4(\text{Adygei, Papuan; CEU, Onge})$ . We computed standard errors using a Block Jackknife with a block size of 5cM. <sup>a</sup> indicates samples from Metspalu et al (2011) and <sup>b</sup> indicates samples from HGDP.

**Table S5. Comparison of expected and observed weighted LD amplitudes for simulated data.**

| Europe %                 | Ref. in <i>ALDER</i> | <i>Single wave</i>         |                            |      |                | <i>Two waves</i>           |                            |       |                |
|--------------------------|----------------------|----------------------------|----------------------------|------|----------------|----------------------------|----------------------------|-------|----------------|
|                          |                      | Expected Amplitude x 10000 | Observed Amplitude x 10000 | Z    | $\alpha_{old}$ | Expected Amplitude x 10000 | Observed Amplitude x 10000 | Z     | $\alpha_{old}$ |
| <b>Simulation Set 1:</b> |                      |                            |                            |      |                |                            |                            |       |                |
| 30%                      | Basque               | 3.18 ± 0.13                | 3.30 ± 0.27                | 0.4  | -0.8 ± 1.8     | 3.16 ± 0.15                | 1.76 ± 0.37                | -3.7  | 11.3 ± 3.6     |
| 50%                      | Basque               | 1.83 ± 0.07                | 1.79 ± 0.23                | -0.2 | 0.5 ± 3.1      | 1.81 ± 0.09                | 1.28 ± 0.12                | -4.2  | 8.7 ± 2.3      |
| 70%                      | Basque               | 0.54 ± 0.03                | 0.56 ± 0.13                | 0.1  | -0.6 ± 4.3     | 0.52 ± 0.04                | 0.11 ± 0.03                | -14.2 | 36.6 ± 4.2     |
| 30%                      | Dai                  | 0.60 ± 0.04                | 0.64 ± 0.14                | 0.3  | -1.5 ± 4.5     | 0.58 ± 0.05                | 0.43 ± 0.12                | -1.1  | 6.1 ± 5.6      |
| 50%                      | Dai                  | 1.88 ± 0.09                | 1.70 ± 0.24                | -0.8 | 2.6 ± 3.5      | 1.88 ± 0.10                | 1.16 ± 0.11                | -4.1  | 11.9 ± 3.0     |
| 70%                      | Dai                  | 3.04 ± 0.11                | 3.31 ± 0.31                | 0.8  | -1.7 ± 2.0     | 3.07 ± 0.14                | 1.78 ± 0.23                | -6.8  | 12.4 ± 2.7     |
| <b>Simulation Set 2:</b> |                      |                            |                            |      |                |                            |                            |       |                |
| 20%                      | Basque               | 3.36 ± 0.20                | 3.28 ± 0.23                | -0.3 | 0.4 ± 1.5      | 3.45 ± 0.24                | 1.81 ± 0.23                | -6.4  | 9.4 ± 1.5      |
| 30%                      | Basque               | 3.13 ± 0.18                | 3.37 ± 0.31                | 0.7  | -1.7 ± 2.6     | 3.32 ± 0.25                | 1.88 ± 0.28                | -3.6  | 10.9 ± 3.1     |
| 40%                      | Basque               | 2.55 ± 0.16                | 2.85 ± 0.31                | 0.9  | -2.8 ± 3.2     | 2.68 ± 0.25                | 1.50 ± 0.24                | -4.0  | 13.2 ± 3.4     |
| 20%                      | Dai                  | 0.22 ± 0.03                | 0.10 ± 0.07                | -1.7 | 10.8 ± 6.8     | 0.18 ± 0.04                | 0.22 ± 0.44                | 0.1   | -3.3 ± 31.7    |
| 30%                      | Dai                  | 0.63 ± 0.05                | 0.59 ± 0.09                | -0.4 | 1.4 ± 3.5      | 0.51 ± 0.08                | 0.29 ± 0.09                | -2.1  | 11.1 ± 5.2     |
| 40%                      | Dai                  | 1.21 ± 0.09                | 1.29 ± 0.19                | 0.4  | -1.5 ± 3.4     | 1.11 ± 0.16                | 0.92 ± 0.12                | -1.2  | 4.5 ± 3.7      |

We simulated 14 diploid individuals with under two admixture models: (a) a single CEU-Han admixture event 100 generations ago, and (b) Two waves of CEU admixture into Han, 300 and 75 generations ago with the European admixture proportion (Europe %) shown above. We performed *ALDER* analysis with the reference population shown above. Standard errors shown are based on jackknife estimates from a single simulation (not standard errors from averaging over multiple simulations). To infer the statistical uncertainty of (Observed - Expected) amplitude, we use a weighted block jackknife dropping each chromosome in turn and repeating the entire procedure. This produces a standard error that allows us to test whether the difference is consistent with zero ( $|Z| < 3$ ).

**Table S6. Dates of admixture using PCA loadings and one reference group**

| Pop (X)                  | <i>n</i> | PCA based weights ( <i>rolloff</i> ) | PCA based weights ( <i>ALDER</i> ) | One reference ( <i>ALDER</i> ) |
|--------------------------|----------|--------------------------------------|------------------------------------|--------------------------------|
| Indo-European rank 1 set | 32       | 77 ± 6                               | 70 ± 7                             | 68 ± 12                        |
| Dravidian rank 1 set     | 33       | 121 ± 17                             | 101 ± 17                           | 105 ± 14                       |

We performed *rolloff* and *ALDER* analysis using SNP loadings computed based on a PCA of Basque and all Indian cline groups (except the target (X)). We also performed *ALDER* analysis using Basque as one reference group. To remove the effects of LD in the ancestral populations, we ignore bins corresponding to genetic distance separation less than 0.5 cM: this threshold is set by *ALDER* after comparison of shared LD between Basque and the admixed groups.

**Table S7. Simulations to test bias in estimated dates of admixture for demographic parameters relevant to Indian groups**

| <b>Group (X)</b>                | <b>Sam-<br/>ples</b> | <b>ANI<br/>ancestry%</b> | <b>Date of mixture<br/>estimated using <i>rolloff</i><br/>from real data (gens)</b> | <b>Mean date<br/>estimate over<br/>100 simulations</b> |
|---------------------------------|----------------------|--------------------------|-------------------------------------------------------------------------------------|--------------------------------------------------------|
| Brahmin                         | 10                   | 62.8 ± 1.4               | 65 ± 9                                                                              | 66                                                     |
| Mala                            | 13                   | 34.3 ± 1.7               | 96 ± 16                                                                             | 99                                                     |
| Pathan <sup>b</sup>             | 15                   | 70.4 ± 1.2               | 73 ± 9                                                                              | 76                                                     |
| <i>Dravidian rank 1 set</i>     | 33                   | 36.9 ± 1.5               | 121 ± 17                                                                            | 123                                                    |
| <i>Indo-European rank 1 set</i> | 32                   | 42.3 ± 1.4               | 77 ± 6                                                                              | 79                                                     |

We simulated individuals of mixed European (CEU) and East Asian (CHB) ancestry where we set sample size, ANI ancestry proportion, and the date of admixture to match the parameters observed in the real data for each Indian group (X). We performed *rolloff* using French and Han as the reference groups and computed the average admixture date (in generations) for 100 simulations.

**Table S8. Record of testing for consistency with simple ANI-ASI mixture**

| <b>Set size</b> | <b>Sets tested</b> | <b>Sets that are rank 1</b> | <b>Sets also passing<br/><i>admixture graph</i></b> |
|-----------------|--------------------|-----------------------------|-----------------------------------------------------|
| 3               | 7,770              | 3,692                       | 1,152                                               |
| 4               | 25,425             | 5,152                       | 860                                                 |
| 5               | 19,239             | 1,293                       | 90                                                  |
| 6               | 1,852              | 30                          | 1                                                   |



**Table S9. Number of times each of 37 Indian groups is included in a rank 1 set**

| Population (X)                      | Linguistic affiliation | Traditional social status | Sampling Location | Set size = 3 | Set size = 4 | Set size = 5 | Set size = 6 | Set size = 7 |
|-------------------------------------|------------------------|---------------------------|-------------------|--------------|--------------|--------------|--------------|--------------|
| Vysya                               | Dravidian              | Middle caste              | Andhra Pradesh    | 0            | 0            | 0            | 0            | 0            |
| Sindhi <sup>b</sup>                 | Indo-European          | Urban groups              | Pakistan          | 2            | 0            | 0            | 0            | 0            |
| Brahmin <sup>a</sup>                | Indo-European          | Upper caste               | Uttar Pradesh     | 4            | 0            | 0            | 0            | 0            |
| Chenchu                             | Dravidian              | Tribal                    | Andhra Pradesh    | 8            | 0            | 0            | 0            | 0            |
| Brahmin                             | Indo-European          | Upper caste               | Uttar Pradesh     | 15           | 0            | 0            | 0            | 0            |
| Pathan <sup>b</sup>                 | Indo-European          | Urban groups              | Pakistan          | 19           | 2            | 0            | 0            | 0            |
| Kshatriya                           | Indo-European          | Upper caste               | Uttar Pradesh     | 22           | 1            | 0            | 0            | 0            |
| Mali                                | Dravidian              | Lower caste               | Lakshadweep       | 24           | 9            | 1            | 0            | 0            |
| Kashmiri Pandit                     | Indo-European          | Upper caste               | Kashmir           | 33           | 10           | 0            | 0            | 0            |
| Kshatriya <sup>a</sup>              | Indo-European          | Upper caste               | Uttar Pradesh     | 40           | 13           | 0            | 0            | 0            |
| Kanjar <sup>a</sup>                 | Indo-European          | Nomadic group             | Uttar Pradesh     | 48           | 23           | 0            | 0            | 0            |
| Kallar <sup>a</sup>                 | Dravidian              | Tribal                    | Tamil Nadu        | 50           | 81           | 20           | 1            | 0            |
| Scheduled caste/ tribe <sup>a</sup> | Dravidian              | Lower caste               | Tamil Nadu        | 52           | 47           | 11           | 1            | 0            |
| Gounder                             | Dravidian              | Middle caste              | Tamil Nadu        | 54           | 59           | 12           | 0            | 0            |
| Velama <sup>a</sup>                 | Dravidian              | Upper caste               | Andhra Pradesh    | 62           | 71           | 11           | 0            | 0            |
| Chamar <sup>a</sup>                 | Indo-European          | Tribal                    | Uttar Pradesh     | 80           | 83           | 14           | 0            | 0            |
| Dharkar <sup>a</sup>                | Indo-European          | Nomadic group             | Uttar Pradesh     | 85           | 53           | 5            | 0            | 0            |
| Kallar                              | Dravidian              | Lower caste               | Tamil Nadu        | 93           | 84           | 14           | 1            | 0            |
| Narikkuravar                        | Dravidian              | Nomadic group             | Tamil Nadu        | 106          | 53           | 4            | 1            | 0            |
| Paniya                              | Dravidian              | Tribal                    | Kerela            | 107          | 81           | 3            | 0            | 0            |
| Tharu                               | Indo-European          | Tribal                    | Uttarkhand        | 118          | 91           | 10           | 0            | 0            |
| Meghawal                            | Indo-European          | Lower caste               | Rajasthan         | 118          | 107          | 11           | 0            | 0            |
| Bhil                                | Indo-European          | Tribal                    | Gujarat           | 119          | 89           | 5            | 0            | 0            |
| Madiga                              | Dravidian              | Lower caste               | Andhra Pradesh    | 123          | 112          | 8            | 0            | 0            |
| Kattunayakan                        | Dravidian              | Tribal                    | Kerela            | 123          | 82           | 10           | 0            | 0            |
| Mala                                | Dravidian              | Lower caste               | Andhra Pradesh    | 123          | 167          | 24           | 0            | 0            |
| Muslim <sup>a</sup>                 | Indo-European          | Religious Group           | Uttar Pradesh     | 124          | 87           | 5            | 0            | 0            |
| Palliyar                            | Dravidian              | Tribal                    | Tamil Nadu        | 124          | 99           | 15           | 0            | 0            |
| Palliyar <sup>a</sup>               | Dravidian              | Lower caste               | Tamil Nadu        | 128          | 81           | 8            | 0            | 0            |
| Adi-Dravidar                        | Dravidian              | Lower caste               | Tamil Nadu        | 143          | 175          | 19           | 0            | 0            |
| Dushadh*                            | Indo-European          | Lower caste               | Uttar Pradesh     | 158          | 169          | 15           | 0            | 0            |
| Lodi                                | Indo-European          | Lower caste               | Uttar Pradesh     | 162          | 212          | 18           | 0            | 0            |
| Malai Kuravar                       | Dravidian              | Tribal                    | Tamil Nadu        | 164          | 195          | 29           | 1            | 0            |
| Jain                                | Indo-European          | Religious Group           | Gujarat           | 169          | 193          | 32           | 0            | 0            |
| Kuruchiyan                          | Dravidian              | Tribal                    | Kerela            | 213          | 322          | 49           | 1            | 0            |
| Onge                                | Jarawa-Onge            | Hunter-gatherer           | Andaman & Nicobar | 215          | 311          | 53           | 0            | 0            |
| Vedda                               | Indo-European          | Tribal                    | Sri Lanka         | 227          | 278          | 44           | 0            | 0            |

<sup>a</sup> indicates samples from Metspalu et al (2011) and <sup>b</sup> indicates groups from HGDP.

## **References**

1. Shah, A.M., Tamang, R., Moorjani, P., Rani, D.S., Govindaraj, P., Kulkarni, G., Bhattacharya, T., Mustak, M.S., Bhaskar, L., and Reddy, A.G. (2011). Indian siddis: African descendants with Indian admixture. *The American Journal of Human Genetics* 89, 154-161.
2. Reich, D., Thangaraj, K., Patterson, N., Price, A., and Singh, L. (2009). Reconstructing Indian population history. *Nature* 461, 489-494.
3. Metspalu, M., Romero, I.G., Yunusbayev, B., Chaubey, G., Mallick, C.B., Hudjashov, G., Nelis, M., Mägi, R., Metspalu, E., and Remm, M. (2011). Shared and unique components of human population structure and genome-wide signals of positive selection in South Asia. *The American Journal of Human Genetics* 89, 731-744.
